# Supplementary material for: Sodium diffusion in ionic liquid-based electrolytes for Na-ion batteries: the effect of polarizable force fields
Source: Royal Society of Chemistry journal article supplement (doi:10.1039/d0cp02760j), 2020-01-01
Supplement: d0cp02760j1.pdf [file d0cp02760j1.pdf]

## SUPPORTING INFORMATION

### Sodium diffusion in ionic liquid-based electrolytes for Na-ion batteries: the effect of polarizable force fields

Arianna Massaro,<sup>1,2</sup> Jocasta Avila,<sup>2</sup> Kateryna Goloviznina,<sup>2</sup> Ivan Rivalta,<sup>2,3</sup> Claudio Gerbaldi,<sup>4</sup> Michele Pavone,<sup>1</sup> Margarida F. Costa Gomes,<sup>2</sup> and Agilio A. H. Pádua<sup>2, a)</sup>

<sup>1)</sup>*Department of Chemical Sciences, Università di Napoli "Federico II",  
via Cintia 26, 80126 Naples, Italy*

<sup>2)</sup>*Univ Lyon, Ens de Lyon, CNRS UMR 5182, Université Claude Bernard Lyon 1,  
Laboratoire de Chimie, F69342, Lyon, France*

<sup>3)</sup>*Dipartimento di Chimica Industriale "Toso Montanari",  
Università degli Studi di Bologna, Viale del Risorgimento 4, I-40136 Bologna,  
Italy*

<sup>4)</sup>*GAME Lab, Department of Applied Science and Technology (DISAT),  
Politecnico di Torino, 10129 Torino, Italy*

---

<sup>a)</sup>Electronic mail: [agilio.padua@ens-lyon.fr](mailto:agilio.padua@ens-lyon.fr)

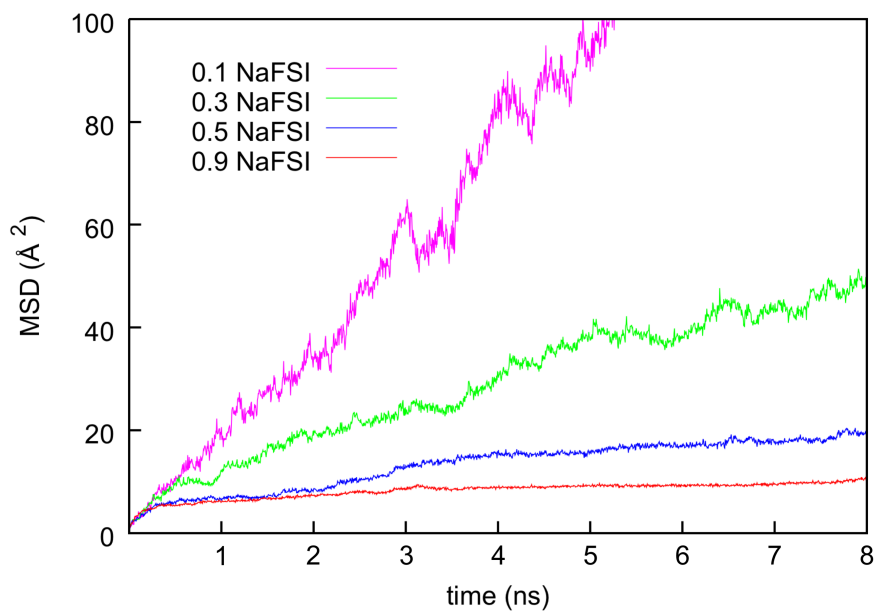

Figure S1. Plot of mean-squared displacement (MSD) of  $\text{Na}^+$  as function of time for each salt content.

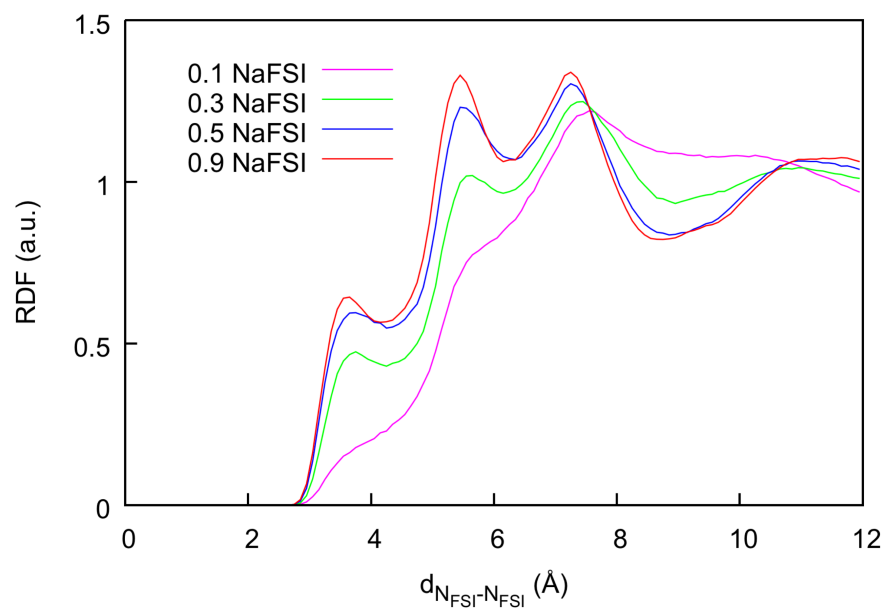

Figure S2. Radial distribution function (RDF) of  $\text{N}_{\text{FSI}}-\text{N}_{\text{FSI}}$  distances.

Table S1.  $\mathcal{A}$  values and viscosity with corresponding deviations,  $\eta$ , computed from non-equilibrium MD trajectories for the 0.1 Na[FSI] system with Drude model.

| $\mathcal{A}(10^{-5} \text{ \AA fs}^{-2})$ | $\eta$ (mPa s) |
|--------------------------------------------|----------------|
| 0.01                                       | $21.1 \pm 1.6$ |
| 0.02                                       | $23.6 \pm 1.0$ |
| 0.04                                       | $17.4 \pm 0.3$ |

Table S2. Density,  $\rho$ , self-diffusion coefficients,  $D_+$ ,  $D_-$  and  $D_{\text{Na}^+}$ , respectively for  $\text{C}_3\text{C}_1\text{pyr}^+$ ,  $\text{FSI}^-$  and  $\text{Na}^+$  calculated with both scaled-charges (ScaleQ) and polarizable model (Drude) at 353 K. Experimental densities at 348 K are marked with \*. Viscosity,  $\eta$ , and corresponding deviations computed with Drude model via non-equilibrium MD simulations at 353 K are also reported.

|                                                                     | $\rho$ (g cm $^{-3}$ ) | $D_+$ (m $^2$ s $^{-1}$ ) | $D_-$ (m $^2$ s $^{-1}$ ) | $D_{\text{Na}^+}$ (m $^2$ s $^{-1}$ ) | $\eta$ (mPa.s) |
|---------------------------------------------------------------------|------------------------|---------------------------|---------------------------|---------------------------------------|----------------|
| <b>[C<math>_3</math>C<math>_1</math>pyr][FSI]</b>                   |                        |                           |                           |                                       |                |
| Exp [1]                                                             | 1.295                  | $14.0 \times 10^{-11}$    | $17.0 \times 10^{-11}$    | –                                     | –              |
| ScaleQ                                                              | 1.254                  | $2.71 \times 10^{-11}$    | $3.20 \times 10^{-11}$    | –                                     | –              |
| Drude                                                               | 1.275                  | $7.08 \times 10^{-11}$    | $7.84 \times 10^{-11}$    | –                                     | $14.3 \pm 0.4$ |
| Exp (this work)                                                     | 1.296                  | –                         | –                         | –                                     | 10.58          |
| <b>0.1 Na[FSI] : 0.9 [C<math>_3</math>C<math>_1</math>pyr][FSI]</b> |                        |                           |                           |                                       |                |
| Exp [2]                                                             | 1.328*                 | –                         | –                         | –                                     | –              |
| ScaleQ                                                              | 1.309                  | $2.57 \times 10^{-11}$    | $2.92 \times 10^{-11}$    | $2.38 \times 10^{-11}$                | –              |
| Drude                                                               | 1.312                  | $4.85 \times 10^{-11}$    | $4.99 \times 10^{-11}$    | $3.27 \times 10^{-11}$                | $23.6 \pm 1.0$ |
| Exp (this work)                                                     | 1.329                  | –                         | –                         | –                                     | 12.73          |
| <b>0.3 Na[FSI] : 0.7 [C<math>_3</math>C<math>_1</math>pyr][FSI]</b> |                        |                           |                           |                                       |                |
| Exp [2]                                                             | 1.419*                 | –                         | –                         | –                                     | –              |
| ScaleQ                                                              | 1.391                  | $1.60 \times 10^{-11}$    | $1.58 \times 10^{-11}$    | $9.37 \times 10^{-12}$                | –              |
| Drude                                                               | 1.403                  | $2.27 \times 10^{-11}$    | $2.03 \times 10^{-11}$    | $1.09 \times 10^{-11}$                | $74.8 \pm 5.8$ |
| Exp (this work)                                                     | 1.407                  | –                         | –                         | –                                     | 18.76          |
| <b>0.5 Na[FSI] : 0.5 [C<math>_3</math>C<math>_1</math>pyr][FSI]</b> |                        |                           |                           |                                       |                |
| Exp [2]                                                             | 1.532*                 | –                         | –                         | –                                     | –              |
| ScaleQ                                                              | 1.497                  | $1.08 \times 10^{-11}$    | $1.01 \times 10^{-11}$    | $7.76 \times 10^{-12}$                | –              |
| Drude                                                               | 1.526                  | $9.27 \times 10^{-12}$    | $6.39 \times 10^{-12}$    | $4.57 \times 10^{-12}$                | $330 \pm 57$   |
| Exp (this work)                                                     | 1.512                  | –                         | –                         | –                                     | 38.73          |
| <b>0.9 Na[FSI] : 0.1 [C<math>_3</math>C<math>_1</math>pyr][FSI]</b> |                        |                           |                           |                                       |                |
| ScaleQ                                                              | 1.855                  | $5.41 \times 10^{-12}$    | $4.50 \times 10^{-12}$    | $3.96 \times 10^{-12}$                | –              |
| Drude                                                               | 1.945                  | $3.46 \times 10^{-12}$    | $2.23 \times 10^{-12}$    | $2.45 \times 10^{-12}$                | $583 \pm 151$  |

Table S3. Salt and IL masses,  $m$ , and molar fractions,  $x$ , of Na[FSI]+[C<sub>3</sub>C<sub>1</sub>pyr][FSI] solutions with corresponding uncertainties.

| $m_{\text{Na[FSI]}}$ (g) | $m_{[\text{C}_3\text{C}_1\text{pyr}][\text{FSI}]}$ (g) | $x$                   |
|--------------------------|--------------------------------------------------------|-----------------------|
| $0.24625 \pm 0.00008$    | $3.34916 \pm 0.00007$                                  | $0.10034 \pm 0.00003$ |
| $0.94658 \pm 0.00002$    | $3.35114 \pm 0.00008$                                  | $0.29994 \pm 0.00001$ |
| $2.19761 \pm 0.00002$    | $3.39323 \pm 0.00003$                                  | $0.49555 \pm 0.00001$ |

Table S4. Parameters,  $A_0$  and  $A_1$ , from linear functions used to fit experimental density as a function of temperature,  $\rho = A_0 + A_1T$ , and corresponding absolute average deviation (AAD).

| Sample      | $A_0$ (g cm <sup>-3</sup> ) | $A_1$ (g cm <sup>-3</sup> K <sup>-1</sup> ) | AAD%  |
|-------------|-----------------------------|---------------------------------------------|-------|
| pure IL     | 1.5716                      | $-7.8061 \times 10^{-4}$                    | 0.007 |
| 0.1 Na[FSI] | 1.6123                      | $-8.0364 \times 10^{-4}$                    | 0.008 |
| 0.3 Na[FSI] | 1.7083                      | $-8.5271 \times 10^{-4}$                    | 0.008 |
| 0.5 Na[FSI] | 1.8366                      | $-9.2016 \times 10^{-4}$                    | 0.010 |

Table S5. Parameters,  $A$ ,  $B$  and  $T_0$ , from VTFH functions used to fit experimental viscosity as a function of temperature,  $\log \eta = A + B/(T - T_0)$ , and corresponding absolute average deviation (AAD).

| Sample      | $A$     | $B$ (K) | $T_0$ (K) | AAD% |
|-------------|---------|---------|-----------|------|
| pure IL     | -0.6894 | 370.6   | 136.8     | 0.6  |
| 0.1 Na[FSI] | -0.6066 | 352.5   | 147.6     | 0.4  |
| 0.3 Na[FSI] | -0.5080 | 319.9   | 173.5     | 0.1  |
| 0.5 Na[FSI] | -2.9417 | 1335.2  | 57.4      | 4.2  |

Table S6: Experimental density,  $\rho$ , and viscosity,  $\eta$ , of the samples listed in Table S3 measured in the temperature range of 293 K to 353 K. The percent deviations,  $\delta$ , refer to the fitting functions with coefficients listed in Table S4 and S5.

| $T$ (K)                                     | $\rho$ (g cm <sup>-3</sup> ) | $\delta_\rho$ (%) | $\eta$ (mPas) | $\delta_\eta$ (%) |
|---------------------------------------------|------------------------------|-------------------|---------------|-------------------|
| <b>[C<sub>3</sub>C<sub>1</sub>pyr][FSI]</b> |                              |                   |               |                   |
| 293.153                                     | 1.342929                     | -0.01             | 47.86         | 0.4               |
| 303.154                                     | 1.334965                     | -0.0002           | 34.76         | -0.4              |
| 313.154                                     | 1.327060                     | 0.007             | 26.17         | -1.2              |
| 323.154                                     | 1.319211                     | 0.01              | 19.69         | 1.3               |
| 333.154                                     | 1.311455                     | 0.007             | 15.73         | 0.4               |
| 343.154                                     | 1.303733                     | 0.0003            | 12.86         | -0.5              |
| 353.154                                     | 1.296094                     | -0.01             | 10.58         | -0.1              |
| <b>0.1 Na[FSI]</b>                          |                              |                   |               |                   |
| 293.149                                     | 1.376948                     | -0.01             | 65.49         | -0.3              |
| 303.154                                     | 1.368701                     | 0.001             | 45.39         | 0.5               |
| 313.154                                     | 1.360558                     | 0.01              | 33.18         | 0.3               |
| 323.154                                     | 1.352486                     | 0.01              | 25.16         | 0.05              |
| 333.154                                     | 1.344511                     | 0.007             | 19.70         | -0.4              |
| 343.155                                     | 1.336571                     | -0.0004           | 15.81         | -0.8              |
| 353.155                                     | 1.328705                     | -0.01             | 12.73         | 0.7               |
| <b>0.3 Na[FSI]</b>                          |                              |                   |               |                   |
| 293.149                                     | 1.458528                     | -0.02             | 146.6         | 0.06              |
| 303.154                                     | 1.449747                     | 0.002             | 91.3          | -0.1              |
| 313.154                                     | 1.441109                     | 0.01              | 60.82         | -0.2              |
| 323.154                                     | 1.432560                     | 0.01              | 42.58         | 0.2               |
| 333.154                                     | 1.424109                     | 0.006             | 31.32         | 0.07              |
| 343.154                                     | 1.415677                     | -0.001            | 23.89         | -0.06             |
| 353.154                                     | 1.407318                     | -0.01             | 18.76         | -0.06             |
| <b>0.5 Na[FSI]</b>                          |                              |                   |               |                   |
| <i>(continued on next page)</i>             |                              |                   |               |                   |

Table S6 – (continued from previous page)

| $T$ (K) | $\rho$ (g cm $^{-3}$ ) | $d$ (%) | $\eta$ (mPas) | $d$ (%) |
|---------|------------------------|---------|---------------|---------|
| 293.153 | 1.567144               | −0.02   | 502.3         | 4.9     |
| 303.154 | 1.557688               | −0.001  | 340.1         | −9.5    |
| 313.154 | 1.548301               | 0.01    | —             | —       |
| 323.155 | 1.539041               | 0.02    | 118.8         | 1.9     |
| 333.154 | 1.529946               | 0.008   | 76.6          | 3.8     |
| 343.154 | 1.520889               | −0.001  | 53.09         | 1.5     |
| 353.154 | 1.511913               | −0.02   | 38.73         | −3.4    |

\* The viscosity value measured at 313.154 K was considered an outlier and excluded from the fitted data.

Table S7. NMR chemical shifts values,  $\delta$  (ppm), of  $^1\text{H}$  and  $^{19}\text{F}$  nuclei.

| Nuclei          | Peak | pure IL | 0.1 Na[FSI] | 0.3 Na[FSI] | 0.5 Na[FSI] |
|-----------------|------|---------|-------------|-------------|-------------|
| $^1\text{H}$    | 1    | 3.488   | 3.472       | 3.443       | 3.409       |
| $^1\text{H}$    | 2    | 3.295   | 3.279       | 3.245       | 3.205       |
| $^1\text{H}$    | 3    | 3.281   | 3.258       | 3.232       | 3.185       |
| $^1\text{H}$    | 4    | 3.275   | 3.237       | 3.214       | 3.165       |
| $^1\text{H}$    | 5    | 3.263   | —           | —           | —           |
| $^1\text{H}$    | 6    | 3.255   | —           | —           | —           |
| $^1\text{H}$    | 7    | 3.024   | 3.009       | 2.983       | 2.954       |
| $^1\text{H}$    | 8    | 2.226   | 2.216       | 2.202       | 2.182       |
| $^1\text{H}$    | 9    | —       | 1.860       | 1.838       | —           |
| $^1\text{H}$    | 10   | 1.853   | 1.841       | 1.820       | —           |
| $^1\text{H}$    | 11   | 1.833   | 1.822       | 1.801       | —           |
| $^1\text{H}$    | 12   | 1.820   | 1.812       | 1.790       | 1.776       |
| $^1\text{H}$    | 13   | 1.813   | 1.801       | 1.780       | 1.767       |
| $^1\text{H}$    | 14   | 1.794   | 1.782       | 1.760       | 1.757       |
| $^1\text{H}$    | 15   | 1.776   | 1.764       | 1.743       | —           |
| $^1\text{H}$    | 16   | 1.014   | 1.005       | 0.990       | 0.972       |
| $^1\text{H}$    | 17   | 0.996   | 0.987       | 0.972       | 0.955       |
| $^1\text{H}$    | 17   | 0.978   | 0.969       | 0.974       | —           |
| $^{19}\text{F}$ | 1    | 52.546  | 52.621      | 52.701      | 52.626      |



Table S8. Self-diffusion coefficients of  $C_3C_1pyr^+$ ,  $D_+$ , and  $FSl^-$ ,  $D_-$ , determined from DOSY-NMR experiments at 298 K and extrapolated to 353 K using the present viscosity data.

| Sample      | 298 K                  |                        | 353 K                  |                        |
|-------------|------------------------|------------------------|------------------------|------------------------|
|             | $D_+(m^2 s^{-1})$      | $D_-(m^2 s^{-1})$      | $D_+(m^2 s^{-1})$      | $D_-(m^2 s^{-1})$      |
| pure IL     | $3.27 \times 10^{-11}$ | $3.44 \times 10^{-11}$ | $1.78 \times 10^{-10}$ | $1.87 \times 10^{-10}$ |
| 0.1 Na[FSl] | $2.35 \times 10^{-11}$ | $2.57 \times 10^{-11}$ | $1.46 \times 10^{-10}$ | $1.59 \times 10^{-10}$ |
| 0.3 Na[FSl] | $1.07 \times 10^{-11}$ | $1.10 \times 10^{-11}$ | $1.01 \times 10^{-10}$ | $1.04 \times 10^{-10}$ |
| 0.5 Na[FSl] | $4.06 \times 10^{-12}$ | $2.69 \times 10^{-12}$ | $6.34 \times 10^{-11}$ | $4.20 \times 10^{-11}$ |

## REFERENCES

- <sup>1</sup>K. Hayamizu, S. Tsuzuki, S. Seki, K. Fujii, M. Suenaga, Y. Umebayashi, *The Journal of Chemical Physics* **133**, 194505 (2010)
- <sup>2</sup>K. Matsumoto, Y. Okamoto, T. Nohira, R. Hagiwara, *The Journal of Physical Chemistry C* **119**, 7648 (2015)
